# Supplementary material for: Intravesical Bacillus Calmette–Guérin Treatment for T1 High-Grade Non-Muscle Invasive Bladder Cancer with Divergent Differentiation or Variant Morphologies
Source: MDPI journal article supplement (doi:10.3390/cancers13112615), 2021-05-26
Supplement: s1 [file s1]

Supplementary

# Intravesical Bacillus Calmette–Guérin Treatment for t1 High-Grade Non-Muscle Invasive Bladder Cancer with Divergent Differentiation or Variant Morphologies

Makito Miyake et. al.

**Table 1.** Clinicopathological variables of patients with T1 high-grade tumor treated with intravesical Bacillus Calmette–Guérin (BCG) and comparison according to divergent differentiation (DD) and variant morphologies (VM).

| Variables              | Total       | Histological Type   |                          |                           | Comparison of Three Groups |
|------------------------|-------------|---------------------|--------------------------|---------------------------|----------------------------|
|                        |             | Pure UC (pUC group) | UC with DD (UC-DD group) | UC with VMs (UC-VM group) |                            |
| N                      | 1490 (100%) | 1395 (94%)          | 65 (4.4%)                | 30 (2.0%)                 | -                          |
| Age, mean ± SD         | 70.7 ± 9.5  | 70.7 ± 9.5          | 70.8 ± 10.1              | 67.4 ± 9.8                | 0.01 #                     |
| Sex                    |             |                     |                          |                           | 0.09 ##                    |
| Male                   | 1227 (82%)  | 1155 (83%)          | 47 (72%)                 | 25 (83%)                  |                            |
| Female                 | 263 (18%)   | 240 (17%)           | 18 (28%)                 | 5 (17%)                   |                            |
| Multiplicity           |             |                     |                          |                           | 0.27 ##                    |
| Single                 | 543 (36%)   | 503 (36%)           | 25 (39%)                 | 15 (50%)                  |                            |
| Multiple               | 947 (64%)   | 892 (64%)           | 40 (61%)                 | 15 (50%)                  |                            |
| Tumor size             |             |                     |                          |                           | 0.10 ##                    |
| <3 cm                  | 1148 (77%)  | 1082 (78%)          | 43 (66%)                 | 23 (77%)                  |                            |
| ≥ 3 cm                 | 342 (23%)   | 313 (22%)           | 22 (34%)                 | 7 (23%)                   |                            |
| Bladder CIS            |             |                     |                          |                           | 0.76 ##                    |
| No                     | 910 (61%)   | 854 (61%)           | 37 (57%)                 | 19 (63%)                  |                            |
| Yes                    | 580 (39%)   | 541 (39%)           | 28 (43%)                 | 11 (37%)                  |                            |
| Prostate-involving CIS |             |                     |                          |                           | 0.72 ##                    |
| No                     | 1462 (98%)  | 1368 (98%)          | 64 (98%)                 | 60 (100%)                 |                            |
| Yes                    | 28 (1.9%)   | 7 (1.9%)            | 1 (1.5%)                 | 0 (0%)                    |                            |
| LVI                    |             |                     |                          |                           | <0.0001 ##                 |
| No                     | 1355 (91%)  | 1275 (91%)          | 60 (92%)                 | 20 (67%)                  |                            |

|                                      |            |            |            |            |            |
|--------------------------------------|------------|------------|------------|------------|------------|
| Yes                                  | 135 (9.1%) | 120 (8.6%) | 5 (7.7%)   | 7 (33%)    |            |
| EORTC recurrence score †, mean ± SD  | 6.1 ± 2.2  | 6.1 ± 2.2  | 6.3 ± 2.2  | 5.7 ± 2.5  | 0.25 #     |
| EORTC progression score †, mean ± SD | 12.9 ± 4.4 | 12.9 ± 4.4 | 13.6 ± 4.5 | 12.9 ± 4.2 | 0.45 #     |
| CUETO recurrence score ‡, mean ± SD  | 5.8 ± 2.5  | 5.8 ± 2.5  | 6.2 ± 3.1  | 5.3 ± 2.0  | 0.40 #     |
| CUETO progression score ‡, mean ± SD | 8.6 ± 2.2  | 8.5 ± 2.2  | 8.8 ± 2.5  | 8.6 ± 1.5  | 0.71 #     |
| Second TUR                           |            |            |            |            | <0.0001 ## |
| No                                   | 649 (44%)  | 629 (45%)  | 11 (17%)   | 9 (30%)    |            |
| Yes                                  | 841 (56%)  | 766 (55%)  | 54 (83%)   | 21 (70%)   |            |
| Maintenance BCG                      |            |            |            |            | 0.79 ##    |
| No                                   | 1249 (84%) | 1167 (84%) | 56 (86%)   | 26 (87%)   |            |
| Yes                                  | 241 (16%)  | 228 (16%)  | 9 (14%)    | 4 (13%)    |            |

Abbreviations: BCG, Bacillus Calmette–Guérin; DD, divergent differentiation; VMs, variant morphologies; SD, standard deviation; CIS, carcinoma in situ; LVI, lymphovascular invasion; EORTC, the European Organisation for Research and Treatment of Cancer; CUETO, the the Spanish Urological Club for Oncological Treatment; TUR, transurethral resection; # Kruskal–Wallis test; ## Chi-square test; † Scores are calculated based on the citation no. 25 (Sylvester RJ et al, 2006); ‡ Sores are calculated based on the citation no. 26 (Fernandez-Gomez J et al, 2009).

**Table S2.** Prognostic variables in patients with T1 high-grade tumor treated using intravesical Bacillus Calmette–Guérin (BCG).

[illegible]

|                        |             |      |           |       |                     |           |       |                     |           |       |                      |           |       |      |           |       |      |           |       |
|------------------------|-------------|------|-----------|-------|---------------------|-----------|-------|---------------------|-----------|-------|----------------------|-----------|-------|------|-----------|-------|------|-----------|-------|
|                        | No          | 1    |           |       | 1                   |           |       | 1                   |           |       |                      |           |       |      |           |       |      |           |       |
|                        | Yes         | 1.05 | 0.86–1.28 | 0.63  | 1.13 0.85–1.50 0.39 |           |       | 0.75 0.47–1.20 0.23 |           |       |                      |           |       |      |           |       |      |           |       |
| Prostate-involving CIS |             |      |           |       |                     |           |       |                     |           |       |                      |           |       |      |           |       |      |           |       |
|                        | No          | 1    |           |       | 1                   |           |       | 1                   |           |       | 1                    |           |       |      |           |       |      |           |       |
|                        | Yes         | 3.41 | 2.13–5.48 | <0.01 | 2.99                | 1.84–4.87 | <0.01 | 4.17                | 2.37–7.31 | <0.01 | 3.72                 | 2.11–6.55 | <0.01 | 1.97 | 0.62–6.23 | 0.25  |      |           |       |
| LVI                    |             |      |           |       |                     |           |       |                     |           |       |                      |           |       |      |           |       |      |           |       |
|                        | No          | 1    |           |       | 1                   |           |       | 1                   |           |       | 1                    |           |       |      |           |       |      |           |       |
|                        | Yes         | 1.52 | 1.13–2.04 | <0.01 | 1.47                | 1.09–1.98 | 0.01  | 1.69                | 1.13–2.54 | 0.01  | 1.59                 | 1.05–2.39 | 0.03  | 1.16 | 0.56–2.41 | 0.69  |      |           |       |
| Histology type         |             |      |           |       |                     |           |       |                     |           |       |                      |           |       |      |           |       |      |           |       |
|                        | Pure UC     | 1    |           |       | 1                   |           |       | 1                   |           |       | 1                    |           |       |      |           |       |      |           |       |
|                        | UC with DD  | 0.91 | 0.56–1.48 | 0.70  | 0.33 0.10–1.03 0.06 |           |       | 0.36 0.12–1.14 0.08 |           |       | NA                   |           |       |      |           |       |      |           |       |
|                        | UC with VMs | 0.78 | 0.37–1.65 | 0.51  | 1.24 0.51–3.02 0.63 |           |       | 1.24 0.51–3.05 0.64 |           |       | 3.38 1.36–8.38 <0.01 |           |       | 3.89 | 1.55–9.77 | <0.01 |      |           |       |
| Second TUR             |             |      |           |       |                     |           |       |                     |           |       |                      |           |       |      |           |       |      |           |       |
|                        | No          | 1    |           |       | 1                   |           |       | 1                   |           |       | 1                    |           |       | 1    |           |       |      |           |       |
|                        | Yes         | 0.72 | 0.60–0.88 | <0.01 | 0.73                | 0.60–0.89 | <0.01 | 0.74                | 0.56–0.98 | 0.04  | 0.77                 | 0.58–1.03 | 0.07  | 0.56 | 0.36–0.88 | 0.01  | 0.60 | 0.37–0.97 | <0.01 |
| Maintenance BCG        |             |      |           |       |                     |           |       |                     |           |       |                      |           |       |      |           |       |      |           |       |
|                        | No          | 1    |           |       | 1                   |           |       | 1                   |           |       | 1                    |           |       |      |           |       |      |           |       |
|                        | Yes         | 0.47 | 0.34–0.64 | <0.01 | 0.52                | 0.38–0.72 | <0.01 | 0.57                | 0.36–0.89 | 0.01  | 0.62                 | 0.39–0.98 | 0.04  | 0.95 | 0.52–1.71 | 0.85  |      |           |       |

Abbreviations: NMIBC, non-muscle invasive bladder cancer; BCG, Bacillus Calmette–Guérin; HR, hazard ratio; CI, confidence interval; CIS, carcinoma in situ; LVI, lymphovascular invasion; TUR, transurethral resection; UC, urothelial carcinoma; DD, divergent differentiation; VMs, variant morphologies; NA, not available because no events seen in this disease subset.

**Table S3.** Background and outcomes of 30 patients with T1 high-grade tumor with variant morphologies (VMs).

| Patient No. | Age | Sex | VMs            | CIS | LVI | Bladder recurrence | Progression    | Pattern of progression    | Survival outcome                 |
|-------------|-----|-----|----------------|-----|-----|--------------------|----------------|---------------------------|----------------------------------|
| 1           | 73  | M   | Micropapillary | +   |     | No                 | No             |                           | Alive, NED (81 months)           |
| 2           | 70  | M   | Micropapillary | +   |     | No                 | No             |                           | Alive, NED (60 months)           |
| 3           | 48  | M   | Micropapillary | +   |     | No                 | No             |                           | Alive, NED (52 months)           |
| 4           | 60  | M   | Micropapillary | +   | +   | No                 | No             |                           | Alive, NED (98 months)           |
| 5           | 69  | M   | Micropapillary |     | +   | No                 | No             |                           | Alive, NED (21 months)           |
| 6           | 81  | M   | Micropapillary | +   | +   | Yes (4 months)     | No             |                           | Dead of other cancer (20 months) |
| 7           | 66  | F   | Micropapillary |     |     | No                 | No             |                           | Alive, NED (61 months)           |
| 8           | 61  | M   | Micropapillary |     |     | Yes (9 months)     | Yes (9 months) | to MIBC and LN metastasis | Dead of BCa (41 months)          |
| 9           | 69  | M   | Micropapillary | +   |     | No                 | No             |                           | Alive, NED (6 months)            |
| 10          | 54  | M   | Micropapillary | +   |     | No                 | No             |                           | Alive, NED (119 months)          |

|    |    |   |                |   |                 |                 |                                |                                    |
|----|----|---|----------------|---|-----------------|-----------------|--------------------------------|------------------------------------|
| 11 | 70 | M | Micropapillary |   | No              | No              |                                | Alive, NED (121 months)            |
| 12 | 62 | M | Micropapillary |   | No              | No              |                                | Alive, NED (78 months)             |
| 13 | 57 | M | Micropapillary | + | No              | No              |                                | Dead of other cancer (41 months)   |
| 14 | 72 | M | Nested         | + | Yes (7 months)  | Yes (7 months)  | to MIBC (T2)                   | Dead of BCa (21 months)            |
| 15 | 85 | M | Nested         | + | Yes (3 months)  | Yes (3 months)  | to MIBC and Adrenal metastasis | Dead of Bca (25 months)            |
| 16 | 60 | M | Nested         |   | No              | No              |                                | Dead of other cancer (135 months)  |
| 17 | 66 | M | Nested         | + | No              | No              |                                | Alive, NED (10 months)             |
| 18 | 70 | M | Nested         | + | Yes (31 months) | Yes (31 months) | to MIBC                        | Dead of BCa (63 months)            |
| 19 | 76 | F | Nested         | + | Yes (57 months) | 0               |                                | Alive, NED (80 months)             |
| 20 | 73 | F | Nested         | + | No              | No              |                                | Alive, NED (100 months)            |
| 21 | 73 | M | Nested         |   | Yes (6 months)  | No              |                                | Alive, NED (74 months)             |
| 22 | 53 | M | Nested         |   | No              | No              |                                | Alive, NED (72 months)             |
| 23 | 63 | M | Sarcomatoid    | + | No              | No              |                                | Alive, NED (23 months)             |
| 24 | 62 | M | Sarcomatoid    |   | Yes (4 months)  | Yes (28 months) | Bone metastasis                | Dead of BCa (39 months)            |
| 25 | 53 | M | Sarcomatoid    | + | No              | No              |                                | Alive, NED (58 months)             |
| 26 | 88 | M | Sarcomatoid    |   | No              | No              |                                | Alive, NED (1 months)              |
| 27 | 70 | M | Clear cell     |   | No              | No              |                                | Alive, NED (101 months)            |
| 28 | 71 | F | Clear cell     |   | No              | No              |                                | Alive, NED (110 months)            |
| 29 | 62 | M | Microcytic     | + | No              | No              |                                | Alive, NED (14 months)             |
| 30 | 85 | F | Giant cell     | + | No              | No              |                                | Dead of unknown cause (135 months) |

Abbreviations: UC, urothelial carcinoma; VMs, variant morphologies; CIS, carcinoma in situ; LVI, lymphovascular invasion; MIBC, muscle invasive bladder cancer; LN, lymph node; NED, no evidence of disease; BCa, bladder cancer.

**Table S4.** Cox proportional hazard regression models for bladder recurrence-free survival.

| Variables    | Univariate |           |         | Multivariate |           |         | Univariate (IPTW Adjusted) |           |         | Multivariate (IPTW Adjusted) |           |         |
|--------------|------------|-----------|---------|--------------|-----------|---------|----------------------------|-----------|---------|------------------------------|-----------|---------|
|              | HR         | 95% CI    | p value | HR           | 95% CI    | p value | HR                         | 95% CI    | p value | HR                           | 95% CI    | p value |
| Age          |            |           |         |              |           |         |                            |           |         |                              |           |         |
| <70          | 1          |           |         | 1            |           |         | 1                          |           |         | 1                            |           |         |
| ≥70          | 1.38       | 1.13–1.69 | <0.01   | 1.02         | 1.01–1.03 | <0.01   | 1.38                       | 1.13–1.69 | <0.01   | 1.31                         | 1.07–1.60 | <0.01   |
| Sex          |            |           |         |              |           |         |                            |           |         |                              |           |         |
| Male         | 1          |           |         |              |           |         | 1                          |           |         |                              |           |         |
| Female       | 0.97       | 0.75–1.26 | 0.84    |              |           |         | 0.97                       | 0.75–1.26 | 0.81    |                              |           |         |
| Multiplicity |            |           |         |              |           |         |                            |           |         |                              |           |         |
| Single       | 1          |           |         | 1            |           |         | 1                          |           |         | 1                            |           |         |

|                        |      |           |        |      |           |        |      |           |        |      |           |        |
|------------------------|------|-----------|--------|------|-----------|--------|------|-----------|--------|------|-----------|--------|
| Multiple Tumor size    | 1.44 | 1.16–1.78 | < 0.01 | 1.43 | 1.16–1.77 | < 0.01 | 1.44 | 1.17–1.78 | < 0.01 | 1.46 | 1.18–1.80 | < 0.01 |
| <3 cm                  | 1    |           |        |      |           |        | 1    |           |        |      |           |        |
| ≥3 cm                  | 1.12 | 0.89–1.40 | 0.35   |      |           |        | 1.10 | 0.87–1.39 | 0.42   |      |           |        |
| Bladder CIS            |      |           |        |      |           |        |      |           |        |      |           |        |
| No                     | 1    |           |        |      |           |        | 1    |           |        |      |           |        |
| Yes                    | 1.03 | 0.84–1.26 | 0.79   |      |           |        | 1.04 | 0.85–1.27 | 0.72   |      |           |        |
| Prostate-involving CIS |      |           |        |      |           |        |      |           |        |      |           |        |
| No                     | 1    |           |        | 1    |           |        | 1    |           |        | 1    |           |        |
| Yes                    | 3.31 | 2.03–5.38 | < 0.01 | 3.02 | 1.86–4.92 | < 0.01 | 3.29 | 1.98–5.46 | < 0.01 | 2.96 | 1.82–4.79 | < 0.01 |
| LVI                    |      |           |        |      |           |        |      |           |        |      |           |        |
| No                     | 1    |           |        | 1    |           |        | 1    |           |        | 1    |           |        |
| Yes                    | 1.52 | 1.13–2.04 | < 0.01 | 1.43 | 1.06–1.92 | 0.02   | 1.49 | 1.10–2.04 | 0.01   | 1.45 | 1.06–1.97 | 0.02   |
| Histology type         |      |           |        |      |           |        |      |           |        |      |           |        |
| Pure UC                | 1    |           |        |      |           |        | 1    |           |        |      |           |        |
| UC with VMs            | 0.78 | 0.37–1.65 | 0.51   |      |           |        | 0.86 | 0.25–2.95 | 0.81   |      |           |        |
| Second TUR             |      |           |        |      |           |        |      |           |        |      |           |        |
| No                     | 1    |           |        | 1    |           |        | 1    |           |        | 1    |           |        |
| Yes                    | 0.71 | 0.59–0.87 | < 0.01 | 0.74 | 0.61–0.90 | < 0.01 | 0.72 | 0.59–0.87 | < 0.01 | 0.73 | 0.60–0.89 | < 0.01 |
| Maintenance BCG        |      |           |        |      |           |        |      |           |        |      |           |        |
| No                     | 1    |           |        | 1    |           |        | 1    |           |        | 1    |           |        |
| Yes                    | 0.48 | 0.35–0.67 | < 0.01 | 0.53 | 0.38–0.74 | < 0.01 | 0.46 | 0.34–0.64 | < 0.01 | 0.49 | 0.36–0.68 | < 0.01 |

Abbreviations: HR, hazard ratio; CI, confidence interval; IPTW, inverse probability of treatment weighting; CIS, carcinoma in situ; LVI, lymphovascular invasion; UC, urothelial carcinoma; VMs, variant morphologies; TUR, transurethral resection; BCG, Bacillus Calmette-Guérin.

**Table 5.** Cox proportional hazard regression models for progression-free survival.

| Variables | Univariate |           |                | Multivariate |           |                | Univariate (IPTW adjusted) |           |                | Multivariate (IPTW adjusted) |           |                |
|-----------|------------|-----------|----------------|--------------|-----------|----------------|----------------------------|-----------|----------------|------------------------------|-----------|----------------|
|           | HR         | 95% CI    | <i>p</i> Value | HR           | 95% CI    | <i>p</i> Value | HR                         | 95% CI    | <i>p</i> Value | HR                           | 95% CI    | <i>p</i> Value |
| Age       |            |           |                |              |           |                |                            |           |                |                              |           |                |
| <70       | 1          |           |                | 1            |           |                | 1                          |           |                | 1                            |           |                |
| ≥70       | 1.28       | 0.96–1.71 | 0.09           | 1.25         | 0.94–1.67 | 0.13           | 1.28                       | 0.96–1.72 | 0.09           | 1.25                         | 0.93–1.67 | 0.14           |
| Sex       |            |           |                |              |           |                |                            |           |                |                              |           |                |
| Male      | 1          |           |                |              |           |                | 1                          |           |                |                              |           |                |
| Female    | 0.90       | 0.62–1.32 | 0.59           |              |           |                | 0.89                       | 0.61–1.30 | 0.56           |                              |           |                |



|                        |      |           |        |      |           |        |      |            |      |      |            |      |  |
|------------------------|------|-----------|--------|------|-----------|--------|------|------------|------|------|------------|------|--|
| Male                   | 1    |           |        |      |           |        | 1    |            |      |      |            |      |  |
| Female                 | 0.78 | 0.41–1.48 | 0.45   |      |           |        | 0.77 | 0.40–1.47  | 0.42 |      |            |      |  |
| Multiplicity           |      |           |        |      |           |        |      |            |      |      |            |      |  |
| Single                 | 1    |           |        |      |           |        | 1    |            |      |      |            |      |  |
| Multiple               | 1.26 | 0.77–2.04 | 0.36   |      |           |        | 1.34 | 0.81–2.22  | 0.26 |      |            |      |  |
| Tumor size             |      |           |        |      |           |        |      |            |      |      |            |      |  |
| <3 cm                  | 1    |           |        |      |           |        | 1    |            |      |      |            |      |  |
| ≥3 cm                  | 1.33 | 0.80–2.21 | 0.27   |      |           |        | 1.19 | 0.71–2.01  | 0.51 |      |            |      |  |
| Bladder CIS            |      |           |        |      |           |        |      |            |      |      |            |      |  |
| No                     | 1    |           |        |      |           |        | 1    |            |      |      |            |      |  |
| Yes                    | 0.77 | 0.47–1.26 | 0.29   |      |           |        | 0.90 | 0.52–1.56  | 0.72 |      |            |      |  |
| Prostate-involving CIS |      |           |        |      |           |        |      |            |      |      |            |      |  |
| No                     | 1    |           |        |      |           |        | 1    |            |      |      |            |      |  |
| Yes                    | 2.41 | 0.76–7.67 | 0.14   |      |           |        | 2.32 | 0.72–7.52  | 0.16 |      |            |      |  |
| LVI                    |      |           |        |      |           |        |      |            |      |      |            |      |  |
| No                     | 1    |           |        |      |           |        | 1    |            |      |      |            |      |  |
| Yes                    | 1.53 | 0.78–2.97 | 0.21   |      |           |        | 1.31 | 0.65–2.65  | 0.46 |      |            |      |  |
| Histology type         |      |           |        |      |           |        |      |            |      |      |            |      |  |
| Pure UC                | 1    |           |        | 1    |           |        | 1    |            |      | 1    |            |      |  |
| UC with VMs            | 3.38 | 1.36–8.38 | < 0.01 | 3.89 | 1.55–9.77 | < 0.01 | 4.67 | 1.25–17.45 | 0.02 | 4.76 | 1.25–18.23 | 0.02 |  |
| Second TUR             |      |           |        |      |           |        |      |            |      |      |            |      |  |
| No                     | 1    |           |        | 1    |           |        | 1    |            |      | 1    |            |      |  |
| Yes                    | 0.62 | 0.39–0.99 | 0.05   | 0.6  | 0.37–0.97 | 0.04   | 0.57 | 0.35–0.95  | 0.03 | 0.58 | 0.34–0.97  | 0.04 |  |
| Maintenance BCG        |      |           |        |      |           |        |      |            |      |      |            |      |  |
| No                     | 1    |           |        |      |           |        | 1    |            |      |      |            |      |  |
| Yes                    | 1.09 | 0.60–1.98 | 0.79   |      |           |        | 1.04 | 0.56–1.90  | 0.91 |      |            |      |  |

Abbreviations: HR, hazard ratio; CI, confidence interval; IPTW, inverse probability of treatment weighting; CIS, carcinoma in situ; LVI, lymphovascular invasion; UC, urothelial carcinoma; VMs, variant morphologies; TUR, transurethral resection; BCG, Bacillus Calmette-Guérin.
